# Supplementary material for: Metabolic Shift of an Isogenic Strain of Enterococcus faecalis 14, Deficient in Its Own Bacteriocin Synthesis, as Revealed by a Transcriptomic Analysis
Source: Int J Mol Sci. 2020 Jun 30;21(13):4653. doi: 10.3390/ijms21134653 (PMC7369866; doi:10.3390/ijms21134653)
Supplement: Supplementary file 1 [file ijms-21-04653-s001.xlsx]

## Sheet: Feuil1
Supplementary Table S1. Gene expression in Enterococcus faecalis 14 Δbac mutant strain.
Log2 of fold change for each individual Δbac (1-3) for up- and down-regulated genes, log2 ratio threshold >1 and <-1 respectively.
Line	Gene ID	locus tag	Protein ID	Δbac1 vs WT	Δbac2 vs WT	Δbac3 vs WT	p value	Functional annotation	Biological process
Genes involved in virulence mechanism
1	251_PI442896112	CAL10_RS01305	WP_061101451.1	-7.56605403817109	-8.45057682075116	-8.37842703499532	0.0012139607	Leaderless two-peptide bacteriocin ddA	antimicrobial peptides
2	250_PI442896112	CAL10_RS01310	WP_061101450.1	-6.63683658520043	-7.49244667586526	-7.49244667586526	0.0015622572	Leaderless two-peptide bacteriocin ddB	antimicrobial peptides
Phage-related genes
3	1305_PI442896112	CAL10_RS06845	WP_086325771.1	1.45222130943674	2.16526362407245	2.65119060553471	0.026659202	Metallo-beta-lactamase superfamily domain protein in prophage	bacteriophage expressed gene
4	1877_PI442896112	CAL10_RS09830	WP_002399588.1	2.08613380925108	2.88135175214427	3.367877845384	0.017601352	Phage Holliday junction resolvase	bacteriophage expressed gene
5	1327_PI442896112	CAL10_RS06965	WP_086325778.1	1.31240901680737	1.84123735687826	2.57375704601328	0.03478883	Phage minor capsid protein	bacteriophage expressed gene
6	1857_PI442896112	CAL10_RS09730	WP_010712970.1	1.71633426139408	3.00091419750913	3.38813084108023	0.03323728	Phage protein	bacteriophage expressed gene
7	1886_PI442896112	CAL10_RS09880	WP_002359946.1	2.53863581126874	2.74585369029841	2.97534886305783	0.0020918138	Transcriptional regulator, Cro/CI family	bacteriophage expressed gene
8	766_PI442896112	CAL10_RS14615	WP_086325847.1	1.08739024368883	2.46670582073371	1.284927476339	0.064462736	Transposase	transposition
9	584_PI442896112	CAL10_RS03080	WP_086325751.1	0.949400041657126	2.14856226432453	1.90029456919965	0.044895023	DNA ligase	DNA repair
10	2681_PI442896112	CAL10_RS13995	WP_002378992.1	0.850747517570985	1.74259871371536	1.3164110899198	0.036902726	DNA mismatch repair protein MutS	DNA repair
11	47_PI442896112	CAL10_RS00245	WP_002356016.1	0.986221958222344	1.71001216364082	1.67721462175923	0.025217235	DNA recombination and repair protein RecF	DNA repair
12	309_PI442896112	CAL10_RS00265	WP_002379277.1	1.18656920515937	2.02889736162763	2.26903136535135	0.030750569	Single-stranded DNA-binding protein	DNA replication, recombination, and repair
13	1878_PI442896112	CAL10_RS03850	WP_002387007.1	2.04857463529697	2.54592248806055	3.25210802938211	0.017359078	Helicase loader DnaI	DNA replication
14	1315_PI442896112	CAL10_RS06895	WP_086325776.1	1.67783676615997	2.02285967212243	2.09066797193513	0.004355239	Replicase domain protein	DNA replication
15	1879_PI442896112	CAL10_RS09840	WP_010713978.1	1.7938747906703	2.32454320630289	2.39341678657568	0.007528999	DnaD domain protein	DNA replication
Genes involved in biofilm formation
16	841_PI442896112	CAL10_RS04390	WP_002358883.1	1.0448187201203	2.25883714212694	2.26059358129186	0.044513367	Cell division protein FtsL	cell division
17	2256_PI442896112	CAL10_RS05550	WP_002363734.1	1.13701037896958	1.56379121131656	1.93322474342198	0.021468008	Cell surface protein precursor	cell adhesion
18	2799_PI442896112	CAL10_RS10305	WP_086325819.1	1.31415932220458	2.35003043101765	2.72517905329098	0.03708123	Cell surface protein	cell adhesion
19	1126_PI442896112	CAL10_RS05900	WP_002379361.1	1.79099544798842	2.11997034836885	0.979218729346219	0.040631603	Fibronectin/fibrinogen-binding protein	cell adhesion
20	278_PI442896112	CAL10_RS01480	WP_086325726.1	1.58082904955873	2.69742964257826	3.16640015397627	0.034087	Surface exclusion protein Sea1/PrgA	biofilm formation and virulence
21	280_PI442896112	CAL10_RS01490	WP_086325727.1	0.917848015808922	1.67193778776634	1.73440187471299	0.031577896	Aggregation substance Asa1/PrgB	biofilm formation and virulence
22	2074_PI442896112	CAL10_RS10850	WP_010706550.1	1.67760734383318	1.86140451985705	1.09264484311202	0.021802997	Late competence protein ComEA, DNA receptor	competence/cell signaling
23	1620_PI442896112	CAL10_RS08475	WP_023895656.1	1.12269483823586	1.74363663606258	2.43081713359819	0.04285552	ComF operon protein C	competence/cell signaling
Genes involved in resistance
24	1397_PI442896112	CAL10_RS03385	WP_002358755.1	0.948948792098345	1.35104723566969	1.38073336621434	0.012636803	Transcriptional regulator, TetR family	transcription regulation
25	2031_PI442896112	CAL10_RS10635	WP_002384232.1	0.904911176564419	2.12049632587231	1.92848682441532	0.048440993	Inner membrane protein translocase component YidC, OxaA protein	cell wall/membrane/envelope biogenesis
26	1122_PI442896112	CAL10_RS05880	WP_002386658.1	1.29287641736272	1.37565409314718	1.2050585385713	0.0014519416	Nucleoside-diphosphate-sugar epimerases	cell wall/membrane/envelope biogenesis
27	2561_PI442896112	CAL10_RS13365	WP_002368406.1	1.52454950399733	1.92135057107137	2.3147112217314	0.01381921	Serine protease, DegP/HtrA	response to environmental stress
28	111_PI442896112	CAL10_RS00580	WP_002383483.1	1.57514227019848	1.05211960579595	1.34027141227593	0.012827481	General stress protein, Gls24 family	response to environmental stress
29	28_PI442896112	CAL10_RS00150	WP_002381329.1	1.08033146265376	1.66287536257228	2.44862952067916	0.048676483	Apo-citrate lyase phosphoribosyl-dephospho-CoA transferase	signal transduction
30	989_PI442896112	CAL10_RS05205	WP_002365495.1	1.06942598018493	1.72563588259875	2.07363345412239	0.031368446	Predicted L-lactate dehydrogenase, Fe-S oxidoreductase subunit YkgE	oxidation-reduction process
31	1090_PI442896112	CAL10_RS05715	WP_002379347.1	2.01919325960766	1.56512364689505	2.43446179340391	0.015298685	NADH peroxidase Npx	oxidation-reduction process
32	72_PI442896112	CAL10_RS00380	WP_010711868.1	1.02608922886866	1.63158866059251	1.48128385461949	0.016965974	ABC transporter, permease protein	transmembrane transport
33	8_PI443061160	CAL10_RS01345	WP_086325718.1	1.49892556779928	0.803124468254339	1.02736327463443	0.032481883	ABC transporter, ATP-binding protein	transmembrane transport
34	1226_PI442896112	CAL10_RS06180	WP_086325766.1	1.36161436005035	2.20215620260229	2.37238461833885	0.024037251	Mg(2+) transport ATPase, P-type	ion transmembrane transport
35	985_PI442896112	CAL10_RS05185	WP_002382100.1	1.7316866587216	2.00249620910875	0.958994570472167	0.037693188	D-serine/D-alanine/glycine transporter	transmambrane transport
Genes involved in metabolic pathways
36	779_PI442896112	CAL10_RS04070	WP_002358841.1	1.04196594040842	2.04838458531708	1.47638591897113	0.034753084	Response regulator receiver: transcriptional regulatory protein	transcription regulation
37	202_PI442896112	CAL10_RS01055	WP_002356215.1	1.18143210165668	2.0174939514393	2.64003861587292	0.04404561	SSU ribosomal protein S8p (S15Ae)	translation
38	182_PI442896112	CAL10_RS00960	WP_002356192.1	0.88799746957927	1.28910008633674	1.58491687541349	0.024967266	Translation elongation factor G	translation
39	1257_PI442896112	CAL10_RS06590	WP_002360428.1	1.12475274624954	1.66309889466166	1.07749077724626	0.020595789	Tripeptide aminopeptidase	protein metabolism
40	2498_PI442896112	CAL10_RS13050	WP_002355101.1	1.48236907536722	1.97931483017164	1.9323230208143	0.0076718777	Ribokinase	nucleotide biosynthesis
41	1547_PI442896112	CAL10_RS08085	WP_002357441.1	1.38576192574292	1.58593630773814	1.068021627819	0.012308217	Adenine phosphoribosyltransferase	nucleotide metabolism
42	868_PI442896112	CAL10_RS04530	WP_002355919.1	1.64225572576867	2.4887737033977	1.96418382065603	0.0144244125	PTS system, cellobiose-specific IIA component	sugar metabolism
43	867_PI442896112	CAL10_RS08490	WP_002360150.1	1.82524215030244	2.61022925933159	2.26776038600339	0.010183323	PTS system, cellobiose-specific IIB component	sugar metabolism
44	1775_PI442896112	CAL10_RS09285	WP_002357098.1	1.17344060268831	1.49847973013723	1.11414929076728	0.008841507	Enolase	glycolysis / gluconeogenesis
45	1393_PI442896112	CAL10_RS09300	WP_002357093.1	1.37269429665842	1.7774488226754	1.28607194191066	0.010325174	NAD-dependent glyceraldehyde-3-phosphate dehydrogenase	glycolysis / gluconeogenesis
46	464_PI442896112	CAL10_RS02480	WP_002387692.1	1.1617270264818	2.93292873799272	2.75696975269775	0.055802763	Beta-propeller domains of methanol dehydrogenase type	oxidoreductase/ methan metabolism
47	135_PI442896112	CAL10_RS00700	WP_002356129.1	3.04953480450554	1.89254707368014	0.953650369957349	0.08339615	Arginine deiminase	arginine and proline metabolism
48	580_PI442896112	CAL10_RS02940	WP_002355534.1	1.14778140086918	2.32255580197289	1.61777259119277	0.038206894	Tagatose-6-phosphate kinase / 1-phosphofructokinase	galactose metabolism
49	2268_PI442896112	CAL10_RS11860	WP_002356454.1	1.11956569890581	2.11375227918917	2.70474306224422	0.0504999	5'-methylthioadenosine nucleosidase / S-adenosylhomocysteine nucleosidase	methionin metabolism
50	2379_PI442896112	CAL10_RS12435	WP_002365150.1	1.14631637381867	2.23092860153361	2.85245502353353	0.05308781	Nicotinate-nucleotide adenylyltransferase	metabolism of cofactors and vitamins
51	1860_PI442896112	CAL10_RS08750	WP_010711708.1	1.89818266372317	2.70259870710939	3.1528008236511	0.019569168	Glycerate kinase	different metabolic pathways
52	2070_PI442896112	CAL10_RS10830	WP_002381566.1	0.906864155431464	1.55301566195408	1.64052620585263	0.027475465	2-dehydropantoate 2-reductase	oxidoreductase / metabolism
53	1944_PI442896112	CAL10_RS11230	WP_002356612.1	1.23351277369472	1.77596497909992	1.04014940096981	0.025600992	Flavodoxin	oxidoreductase / metabolism
54	2211_PI442896112	CAL10_RS11575	WP_002356530.1	1.27250916311202	1.0323701395813	1.10809211791958	0.003859356	Heat shock protein 60 family co-chaperone GroES	protein folding/ mitochondrial biogenesis
55	2488_PI442896112	CAL10_RS12995	WP_086325833.1	1.00390143768233	2.13547263122256	2.04586473078602	0.041427128	Ubiquinol-cytochrome C reductase iron-sulfur subunit	oxidative phosphorylation/ energy metabolism
56	1361_PI442896112	CAL10_RS07145	WP_002381927.1	1.18859051105332	2.03772384542669	2.12985668626285	0.027019836	V-type ATP synthase subunit G	oxidative phosphorylation/ energy metabolism
57	1229_PI442896112	CAL10_RS06455	WP_002363856.1	1.60458832393668	2.08945498995024	2.12063088583342	0.0073474026	Dihydrolipoamide acetyltransferase component of pyruvate dehydrogenase complex	TCA cycle
Genes with unknown function
58	1435_PI442896112	CAL10_RS07515	WP_002382324.1	1.22239242133645	1.66666423280274	1.31015092711101	0.009288081	DegV family protein	unknown
59	463_PI442896112	CAL10_RS02475	WP_002386098.1	1.40406825149774	2.45762976573683	2.21783568985043	0.023869429	LemA family protein	unknown
60	549_PI442896112	CAL10_RS02905	WP_002355526.1	0.913751352038664	1.98459407246707	1.5501606181785	0.04127157	Hypothetical protein SAV1839	unknown
61	277_PI442896112	CAL10_RS01475	WP_086325725.1	1.43863830008012	1.94597990367881	1.40034981535575	0.01193723	FIG00630374: hypothetical protein	unknown
62	292_PI442896112	CAL10_RS01555	WP_002360820.1	0.936334373501001	1.89194025414255	1.20300735639814	0.04207406	FIG00632142: hypothetical protein	unknown
63	2697_PI442896112	CAL10_RS14080	WP_002354843.1	1.07113003176268	1.83065642872967	1.89555846717922	0.0263145	FIG00628641: hypothetical protein	unknown
64	1293_PI442896112	CAL10_RS06780	WP_010714013.1	0.991059955646786	1.22779340005025	1.12580936776002	0.00375998	FIG00631897: hypothetical protein	unknown
65	1955_PI442896112	CAL10_RS10240	WP_002387246.1	0.951200701521546	1.23694225827572	1.25849552623264	0.007348874	FIG00627620: hypothetical protein	unknown
66	675_PI442896112	CAL10_RS03535	WP_010709263.1	1.21676325190356	1.83081866414505	1.52904117675721	0.013235463	FIG00631180: hypothetical protein	unknown
67	295_PI442896112	CAL10_RS01570	WP_086325735.1	0.912947190027364	1.48741731693088	1.25666397368001	0.018234534	FIG00630159: hypothetical protein	unknown
68	2468_PI442896112	CAL10_RS12890	WP_002380876.1	1.44488164510464	1.93733200703625	1.766809739992	0.0070021185	FIG00628307: hypothetical protein	unknown
69	127_PI442896112	CAL10_RS00660	WP_002356119.1	1.25866921327239	1.67882084424788	1.39169463190318	0.0073002097	FIG00630781: hypothetical protein	unknown
70	1608_PI442896112	CAL10_RS08405	WP_002364070.1	2.40037384090148	4.03457068287201	4.33498424771281	0.02690829	Hypothetical protein, homolog of fig|393130.3.peg.2627	unknown
71	109_PI442896112	CAL10_RS11865	WP_002356451.1	1.35892203423319	1.87450570587625	2.11572975913306	0.015311492	Conserved hypothetical protein	unknown
